# Supplementary material for: Eurasian jays do not copy the choices of conspecifics, but they do show evidence of stimulus enhancement
Source: PubMed Central journal article supplement (PMC5136130; doi:10.7717/peerj.2746), 2016-12-01
Supplement: peerj-04-2746-s001.pdf [file peerj-04-2746-s001.pdf]

### Electronic Supplementary Material 1 for

Miller R, Logan CJ, Lister K, Clayton NS. 2016. Eurasian jays do not copy the choices of conspecifics, but they do show evidence of stimulus enhancement. *PeerJ* 4:e2746. doi:10.7717/peerj.2746.

Table S1. The number of object insertions (accidental and proficient) required per subject to solve the task (i.e., complete stage 3). The observer and control groups were trained following completion of Experiment 1.

| <b>Group</b> | <b>ID</b> | <b>Sex</b> | <b># of object insertions to solve the task</b> |
|--------------|-----------|------------|-------------------------------------------------|
| Trained      | Stuka     | F          | 102                                             |
| Trained      | Dolci     | F          | 136                                             |
| Trained      | Homer     | M          | 111                                             |
| Trained      | Horatio   | M          | 155                                             |
| Trained      | Jaylo     | F          | 223                                             |
| Trained      | Poe       | M          | 275                                             |
| Observer     | Cern      | M          | 100                                             |
| Observer     | Booster   | M          | 102                                             |
| Observer     | Gizmo     | F          | 90                                              |
| Observer     | Lintie    | F          | 139                                             |
| Observer     | Godot     | M          | 119                                             |
| Observer     | Penny     | F          | 135                                             |
| Control      | Chinook   | F          | 104                                             |
| Control      | Dexter    | M          | 137                                             |
| Control      | Roland    | M          | 97                                              |
